# Supplementary material
Source: PubMed Central journal article supplement (PMC6125776)
Supplement: NIHMS987087-supplement-Supplementary_Material.pdf [file NIHMS987087-supplement-Supplementary_Material.pdf]

## APPENDIX 1

**The ratio of cortical/total bone may be considered an index of bone remodeling because it reflects the age-related imbalance between endosteal resorption and periosteal apposition in a better way than bone mass density (BMD) does. At any rate, the results of the study do not change taking into account BMD, as shown in the tables below.**

Table 1. Association between trabecular BMD and carotideal plaques, adjusted for potential confounders.

|                                                  | Odds ratio | Lower 95% CI | Upper 95% CI |
|--------------------------------------------------|------------|--------------|--------------|
| Trabecular BMD, Worst qtl vs. Best               | 0.65       | 0.32         | 1.27         |
| Trabecular BMD, II qtl vs. Best                  | 0.81       | 0.42         | 1.58         |
| Trabecular BMD, III qtl vs. Best                 | 0.88       | 0.45         | 1.69         |
| Years since menopause (1 year increments)        | 1.07       | 1.03         | 1.1          |
| BMI (unit increments)                            | 1          | 0.93         | 1.08         |
| Log PTH (unit)                                   | 0.85       | 0.48         | 1.47         |
| Log Vitamin D (unit)                             | 0.76       | 0.48         | 1.18         |
| Log Leptin (unit)                                | 0.91       | 0.65         | 1.27         |
| Log DHEAS (unit)                                 | 0.98       | 0.73         | 1.3          |
| Log free testosterone (unit)                     | 0.82       | 0.63         | 1.07         |
| MUFA intake (unit)                               | 1.01       | 0.99         | 1.04         |
| Low physical activity in the last year (Y vs. N) | 0.67       | 0.4          | 1.13         |
| Diabetes mellitus                                | 0.9        | 0.41         | 1.95         |
| Chronic obstructive pulmonary disease            | 0.51       | 0.12         | 1.84         |
| Creatinine clearance < 60 ml/min                 | 1.02       | 0.58         | 1.81         |

Table 2. Association between cortical BMD and carotid plaques, adjusted for potential confounders.

|                                                  | <b>Odds ratio</b> | <b>Lower 95% CI</b> | <b>Upper 95% CI</b> |
|--------------------------------------------------|-------------------|---------------------|---------------------|
| Cortical BMD, Worst qtl vs. Best                 | 0.97              | 0.48                | 1.95                |
| Cortical BMD, II qtl vs. Best                    | 0.91              | 0.46                | 1.79                |
| Cortical BMD, III qtl vs. Best                   | 0.9               | 0.47                | 1.72                |
| Years since menopause (1 year increments)        | 1.06              | 1.03                | 1.1                 |
| BMI (unit increments)                            | 1.01              | 0.94                | 1.08                |
| Log PTH (unit)                                   | 0.9               | 0.51                | 1.57                |
| Log Vitamin D (unit)                             | 0.77              | 0.49                | 1.21                |
| Log Leptin (unit)                                | 0.92              | 0.66                | 1.28                |
| Log DHEAS (unit)                                 | 0.97              | 0.73                | 1.29                |
| Log free testosterone (unit)                     | 0.79              | 0.6                 | 1.04                |
| MUFA intake (unit)                               | 1.01              | 0.99                | 1.04                |
| Low physical activity in the last year (Y vs. N) | 0.63              | 0.37                | 1.06                |
| Diabetes mellitus                                | 1.04              | 0.47                | 2.31                |
| Chronic obstructive pulmonary disease            | 0.56              | 0.14                | 1.93                |
| Creatinine clearance < 60 ml/min                 | 1.02              | 0.58                | 1.82                |

Table 3. Association between trabecular BMD and PAD, adjusted for potential confounders.

|                                                  | <b>Odds ratio</b> | <b>Lower 95% CI</b> | <b>Upper 95% CI</b> |
|--------------------------------------------------|-------------------|---------------------|---------------------|
| Trabecular BMD, Worst qtl vs. Best               | 1.52              | 0.57                | 4.21                |
| Trabecular BMD, II qtl vs. Best                  | 1.16              | 0.41                | 3.3                 |
| Trabecular BMD, III qtl vs. Best                 | 1.66              | 0.62                | 4.62                |
| Years since menopause (1 year increments)        | 1.02              | 0.97                | 1.06                |
| BMI (unit increments)                            | 1.07              | 0.97                | 1.18                |
| Log PTH (unit)                                   | 0.43              | 0.19                | 0.96                |
| Log Vitamin D (unit)                             | 0.75              | 0.39                | 1.44                |
| Log Leptin (unit)                                | 0.92              | 0.58                | 1.47                |
| Log DHEAS (unit)                                 | 0.83              | 0.56                | 1.22                |
| Log free testosterone (unit)                     | 0.63              | 0.45                | 0.87                |
| MUFA intake (unit)                               | 1.03              | 1                   | 1.07                |
| Low physical activity in the last year (Y vs. N) | 1.41              | 0.65                | 3.28                |
| Diabetes mellitus                                | 0.88              | 0.23                | 2.63                |
| Chronic obstructive pulmonary disease            | 1.51              | 0.3                 | 5.67                |
| Creatinine clearance < 60 ml/min                 | 1.51              | 0.64                | 3.63                |

Table 4. Association between cortical BMD and PAD, adjusted for potential confounders.

|                                                  | <b>Odds ratio</b> | <b>Lower 95% CI</b> | <b>Upper 95% CI</b> |
|--------------------------------------------------|-------------------|---------------------|---------------------|
| Cortical BMD, Worst qtl vs. Best                 | 2.46              | 0.86                | 7.62                |
| Cortical BMD, II qtl vs. Best                    | 1.29              | 0.42                | 4.12                |
| Cortical BMD, III qtl vs. Best                   | 2.18              | 0.79                | 6.5                 |
| Years since menopause (1 year increments)        | 1.02              | 0.98                | 1.07                |
| BMI (unit increments)                            | 1.07              | 0.97                | 1.19                |
| Log PTH (unit)                                   | 0.38              | 0.16                | 0.86                |
| Log Vitamin D (unit)                             | 0.81              | 0.41                | 1.57                |
| Log Leptin (unit)                                | 0.9               | 0.56                | 1.46                |
| Log DHEAS (unit)                                 | 0.86              | 0.58                | 1.28                |
| Log free testosterone (unit)                     | 0.63              | 0.45                | 0.89                |
| MUFA intake (unit)                               | 1.03              | 1                   | 1.07                |
| Low physical activity in the last year (Y vs. N) | 1.4               | 0.62                | 3.4                 |
| Diabetes mellitus                                | 0.87              | 0.19                | 2.97                |
| Chronic obstructive pulmonary disease            | 1.18              | 0.23                | 4.46                |
| Creatinine clearance < 60 ml/min                 | 1.59              | 0.67                | 3.84                |
